# Supplementary material
Source: HighWire-hosted journal article supplement (doi:10.1101/rna.080659.125)
Supplement: Supplemental_TableS6.xlsx [file Supplemental_TableS6.xlsx]

## Sheet: Tabelle1
Primer Name	Primer Sequence	Primer Purpose
olS198	CGGCTGCCATGAACCACT	forward primer of qPCR for exon 1 of AFUB_001550
oLS199	GGCATCGAAGGCGGTCG	reverse primer of qPCR for exon 1 of AFUB_001550
oLS200	CTCGGCCATTTCCTGCTGTT	forward primer of qPCR for exon 4 of AFUB_001550
oLS201	GGATCCCGCTCTTCCGGT	reverse primer of qPCR for exon 4 of AFUB_001550
oLS214	GTAGGCTAGTTGTTCTTTTCCATTACAGAC	forward primer of qPCR for 5'UTR of AFUB_069590
oLS216	GCCTCCCAGACTTCGTTCAGA	reverse primer of qPCR for 5'UTR of AFUB_069590
oLS217	GCCCGTCCCAAACCCATAAG	forward primer of qPCR for exon 5 of AFUB_069590
oLS218	CGAGTGCCCATAGAAGATGGAGG	reverse primer of qPCR for exon 5 of AFUB_069590
oARK0088	ATCTGTTCGCCAAGCCCAAG	forward primer of qPCR for 5'UTR of AFUB_058180 (coxV)
oARK0089	TCACTGCTGACACCGTAGAG	reverse primer of qPCR for 5'UTR of AFUB_058180 (coxV)
